# Supplementary material
Source: publisher site journal article supplement (https://www.dovepress.com/article/592035)
Supplement: Supplementary file 1 [file 592035%20Figure%20S1.pdf]

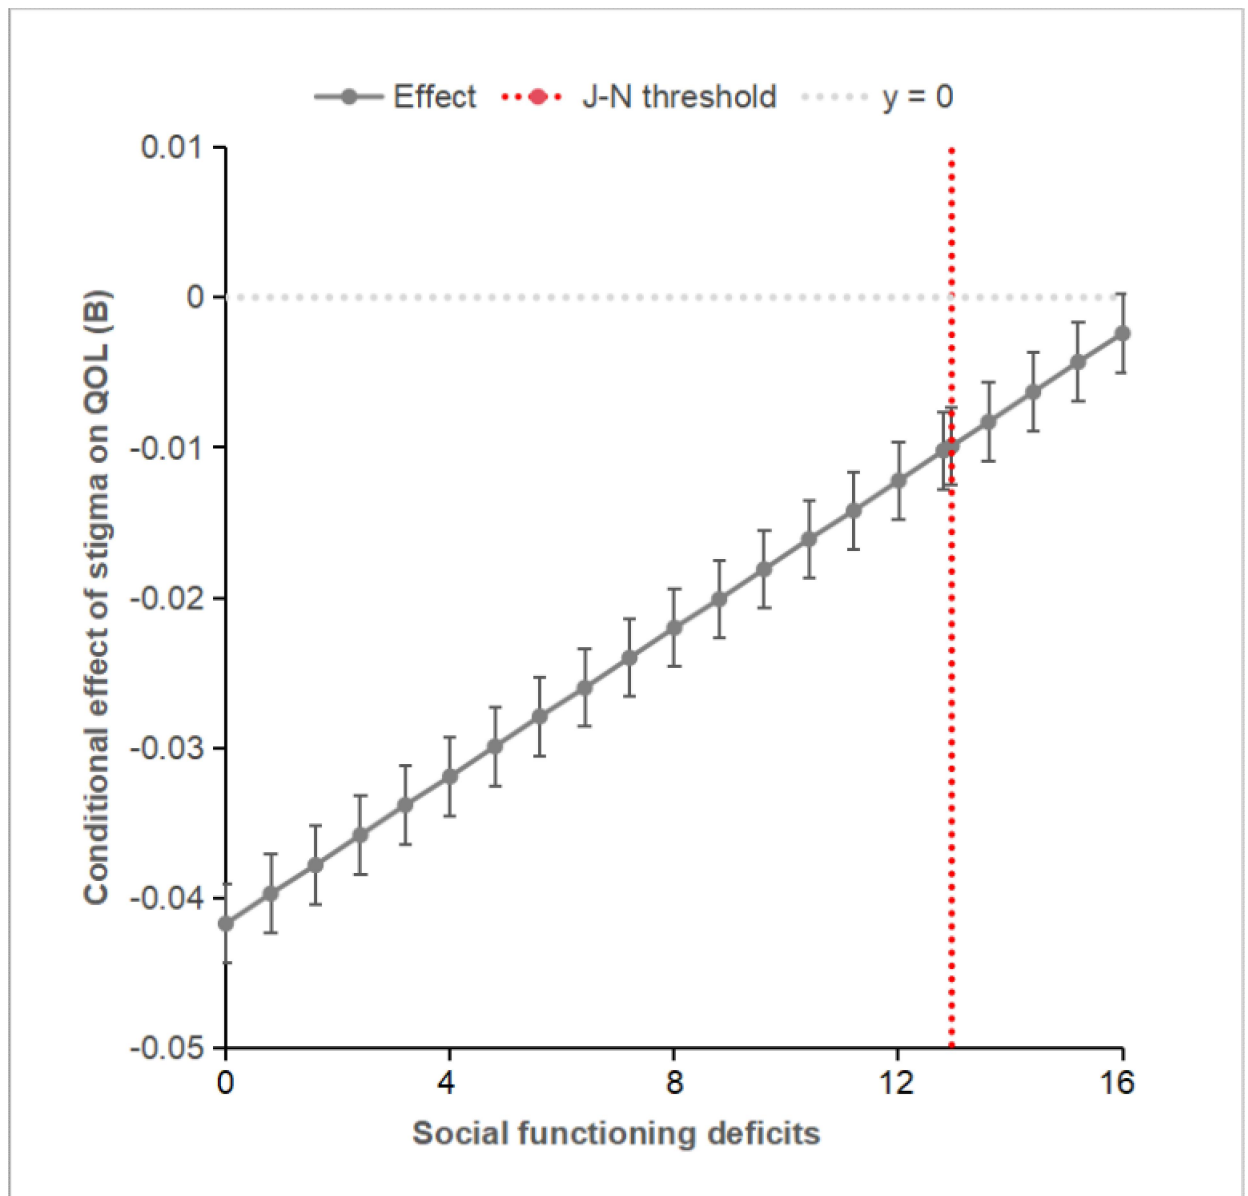

**Johnson - Neyman plot of the conditional effect of stigma on quality of life across social functioning deficits.**

Notes : The solid line represents the conditional effect of stigma on QOL (unstandardized coefficient B) at each level of social functioning deficits, measured by the original 8-item SDSS scale (range 0 - 16). The error bars indicate the 95% confidence intervals. The vertical dashed line marks the Johnson - Neyman threshold at SDSS = 12.95. The effect of stigma on QOL is statistically significant ( $p < 0.05$ ) for SDSS scores below this threshold (left of the vertical line, representing 63.1% of the sample), and non- significant for scores above this threshold. The horizontal dashed line at B = 0 is shown for reference.
